# Supplementary material
Source: ML conference proceedings conference paper supplement (https://www.ecva.net/papers/eccv_2024/papers_ECCV/html/2629_ECCV_2024_paper.php)
Supplement: Supplementary file 1 [file 02629-supp.pdf]

# ShareGPT4V: Improving Large Multi-Modal Models with Better Captions

Lin Chen<sup>\*1,3</sup>, Jinsong Li<sup>\*2,3</sup>, Xiaoyi Dong<sup>2,3</sup>, Pan Zhang<sup>3</sup>, Conghui He<sup>3</sup>,  
Jiaqi Wang<sup>3</sup>, Feng Zhao<sup>†1</sup>, Dahua Lin<sup>†2,3,4</sup>

<sup>1</sup>MoE Key Laboratory of BIPC, University of Science and Technology of China

<sup>2</sup>The Chinese University of Hong Kong    <sup>3</sup>Shanghai AI Laboratory

<sup>4</sup>Centre for Perceptual and Interactive Intelligence (CPPI)

## A Data Sources

**Data Source Composition for ShareGPT4V.** To maximize the comprehensiveness of our captions, we compiled a total of 100K images from diverse sources. This includes 50K images from COCO [2], 30K images from 'LCS' (which abbreviates LAION [6], CC-3M [7], and SBU [4]), 20K images from SAM [1], 500 images from TextCaps [8], 500 images from WikiArt [5], and 1K images from web-crawled data (split evenly between images of landmarks and images of celebrities).

**Data Source Composition for ShareGPT4V-PT.** We utilized our pre-trained Share-Captioner to generate the pre-training dataset. This dataset is comprised of a subset of 1.2M images selected from existing public datasets. These include 118K images from COCO [2], 570K images from SAM [1], and 558K images from LLaVA-1.5 pre-training data [3].

## B Extra experiments

**How about using the full ShareGPT4V dataset in SFT?** We experimented with replacing the original 23K captions with the entire 100K detailed captions in SFT, resulting in 100K/742K detail-caption/training data. As shown in Table 1, more high-quality data can further improve the model performance on all the tasks. The experiments conducted in the main paper primarily aimed at ensuring a fair comparison with baseline methods. Therefore we decided to use an equivalent amount of 23K high-quality captions for substitution. Future researchers could utilize the full 100K ShareGPT4V dataset to further enhance the performance of their LMMs.

**Is it the more detailed captions or fewer hallucinations that lead to better modality alignment?** To align with LLaVA-1.5's detail level roughly, we truncated 23K ShareGPT4V captions by LLaVA-1.5's average caption length. We posited that such truncation holds a fixed hallucination rate. As shown in Table 2, both factors aid modality alignment and the detailness slightly bringing more gain.

---

<sup>\*</sup> Equal contribution    <sup>†</sup> Corresponding authors.

**Table 1:** Comparison of replacing with 23K and 100K captions.

| Method       | detailed caption in SFT data | MME <sup>P</sup> | MMB         | SEED        | MM-Vet      | LLaVA <sup>W</sup> |
|--------------|------------------------------|------------------|-------------|-------------|-------------|--------------------|
| LLaVA-1.5-7B | Original 23K                 | 1510.7           | 64.3        | 66.2        | 30.5        | 63.4               |
| LLaVA-1.5-7B | ShareGPT4V 23K               | 1516.9           | 65.3        | 66.8        | 34.0        | 71.6               |
| LLaVA-1.5-7B | ShareGPT4V 100K              | <b>1540.3</b>    | <b>65.9</b> | <b>68.8</b> | <b>36.7</b> | <b>72.3</b>        |

**Table 2:** Compare detailness and hallucination. ‘tr’ for truncated.

| Method       | detailed caption in SFT data | MME <sup>P</sup> | MMB         | SEED        | MM-Vet      | LLaVA <sup>W</sup> |
|--------------|------------------------------|------------------|-------------|-------------|-------------|--------------------|
| LLaVA-1.5-7B | Original 23K                 | 1510.7           | 64.3        | 66.2        | 30.5        | 63.4               |
| LLaVA-1.5-7B | ShareGPT4V-tr 23K            | 1513.1           | 64.6        | 66.4        | 32.3        | 67.5               |
| LLaVA-1.5-7B | ShareGPT4V 23K               | <b>1516.9</b>    | <b>65.3</b> | <b>66.8</b> | <b>34.0</b> | <b>71.6</b>        |

## C Caption Analysis

Figure 1 provides a visualization of the root noun-verb pairs for the captions generated by both GPT4-Vision and Share-Captioner. It’s clear to see that the diversity and linguistic expression of the captions produced by Share-Captioner are comparable to those of GPT4-Vision.

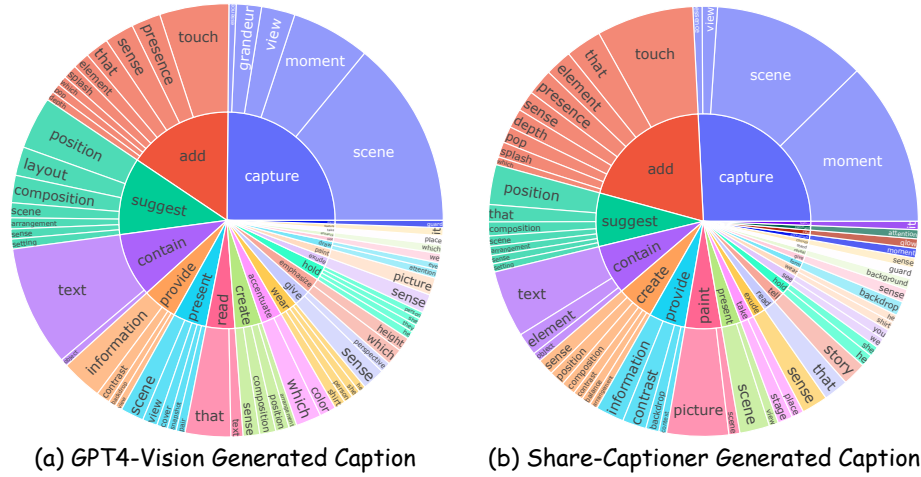

**Fig. 1: Analysis of captions generated by GPT4-Vision and Share-Captioner.** Visualization of the root noun-verb pairs (occurring over 1%) of the captions.

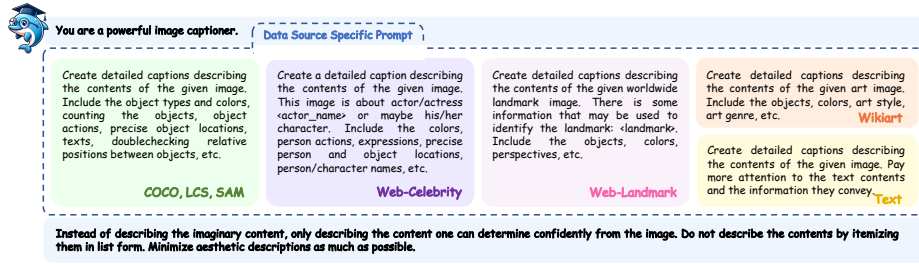

**Fig. 2: Prompts for instructing GPT4-Vision to generate detailed descriptions.** The Prompts are designed with base prompts at the beginning and end, with a data-specific prompt placed in between.

## D Prompts

Given the diversity of our image sources, we expect a highly content-related description for each image. As shown in Figure 2, we designed a base prompt for a general description and added a specialized prompt for each data source.

## E Details about Share-Captioner

Our captioner is built on the open-source LMM, InternLM-XComposer [9]. It contains an LLM InternLM-7B, a ViT EVG-g 1B, and a small Perceive Sampler. Specifically, we increased its resolution from  $224 \times 224$  to  $448 \times 448$  by fine-tuning the vision encoder to match the detail required for high-quality captions. It was trained on the 100K ShareGPT4V dataset with a learning rate of  $2e-5$ , a batch size of 1024, over 2 epochs using 16 A100 GPUs for 3 hours. During training, we set a unified prompt for all captions, "Analyze the image in a comprehensive and detailed manner", to minimize the need for the data-specific prompt design.

## F Examples

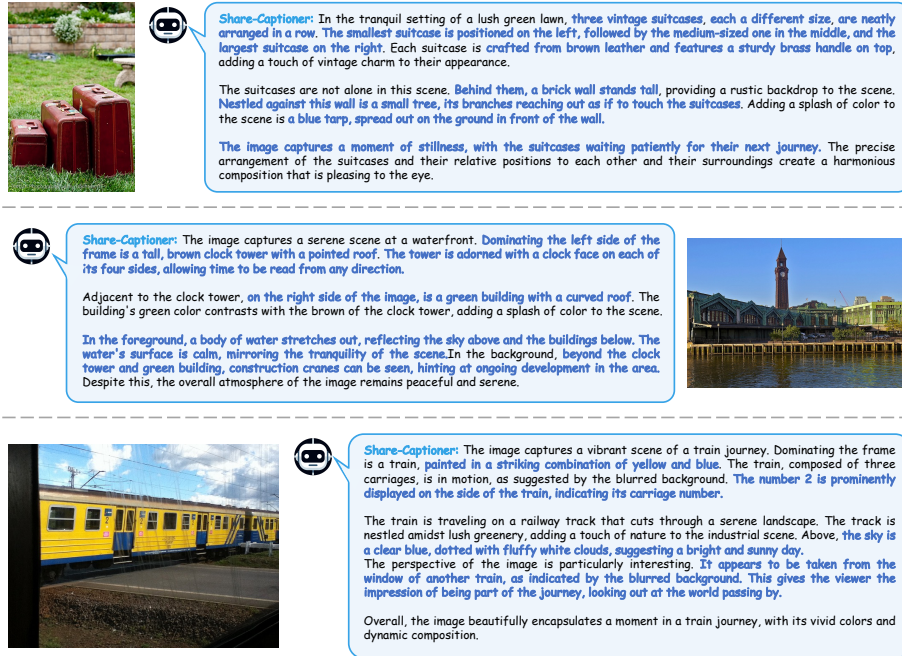

**Fig. 3: Examples of captions generated by Share-Captioneer.** Detailed and accurate parts within the captions are emphasized in blue.

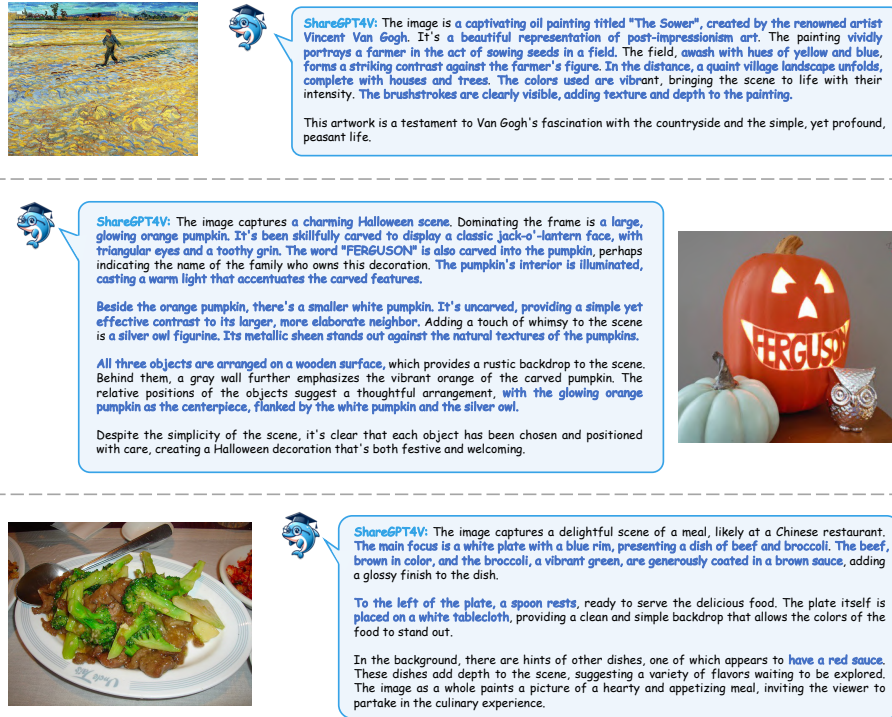

**Fig. 4: Examples of captions generated by ShareGPT4V.** Detailed and accurate parts within the captions are emphasized in blue.

**User:** Different idea



**User:** Who are the 2 characters in the picture?

**ShareGPT4V-7B:** The two characters in the picture are Steve Jobs and Isaac Newton.

**User:** What different ideas did they get from the apple?

**ShareGPT4V-7B:** Steve Jobs and Isaac Newton got the idea of the Apple computer and the concept of gravity, respectively, from an apple.

**User:**



**User:** What is the most common catchphrase of the character on the right?

**ShareGPT4V-7B:** The most common catchphrase of the character on the right is "I am the one who knocks." This phrase is associated with the character Walter White from the TV show Breaking Bad, played by Bryan Cranston. Walter White is a methamphetamine manufacturer and distributor who is known for his intelligence, wit, and unpredictable behavior. The catchphrase is often used by Walter White to express his confidence and assertiveness, and it has become iconic in the series.

**User:** What kind of life would he have lived if he and Jesse Pinkman hadn't met?

**ShareGPT4V-7B:** If Walter White and Jesse Pinkman had never met, Walter White's life would have likely been very different. In the original timeline of the show, Walter White was a high school chemistry teacher who was diagnosed with cancer and decided to produce and sell methamphetamine to provide for his family after his death. He chose Jesse Pinkman, a former student and small-time criminal, as his partner in this venture.

Without Jesse, Walter would have had to find another partner or work alone to produce and distribute the methamphetamine. He might have had to rely on his own skills and knowledge to create the product and find customers. However, without Jesse's skills, connections, and resourcefulness, Walter's operation would likely have been smaller and less successful.

Additionally, without Jesse, Walter's character development would have been significantly altered. Jesse's presence and influence on Walter's life helped him to grow and change into the complex and morally ambiguous character that we see in the show. The relationship between Walter and Jesse is a central theme of Breaking Bad, and their dynamic drives much of the plot and character development.

**Fig. 5: Example of Multi-Round Dialog of ShareGPT4V-7B.** Detailed and accurate parts within the captions are emphasized in blue.

## References

1. Kirillov, A., Mintun, E., Ravi, N., Mao, H., Rolland, C., Gustafson, L., Xiao, T., Whitehead, S., Berg, A.C., Lo, W.Y., et al.: Segment anything. arXiv preprint arXiv:2304.02643 (2023)
2. Lin, T.Y., Maire, M., Belongie, S., Hays, J., Perona, P., Ramanan, D., Dollár, P., Zitnick, C.L.: Microsoft coco: Common objects in context. In: Computer Vision—ECCV 2014: 13th European Conference, Zurich, Switzerland, September 6–12, 2014, Proceedings, Part V 13. pp. 740–755. Springer (2014)
3. Liu, H., Li, C., Li, Y., Lee, Y.J.: Improved baselines with visual instruction tuning. arXiv preprint arXiv:2310.03744 (2023)
4. Ordonez, V., Kulkarni, G., Berg, T.: Im2text: Describing images using 1 million captioned photographs. *Advances in neural information processing systems* **24** (2011)
5. Saleh, B., Elgammal, A.: Large-scale classification of fine-art paintings: Learning the right metric on the right feature. arXiv preprint arXiv:1505.00855 (2015)
6. Schuhmann, C., Vencu, R., Beaumont, R., Kaczmarczyk, R., Mullis, C., Katta, A., Coombes, T., Jitsev, J., Komatsuzaki, A.: Laion-400m: Open dataset of clip-filtered 400 million image-text pairs. arXiv preprint arXiv:2111.02114 (2021)
7. Sharma, P., Ding, N., Goodman, S., Soricut, R.: Conceptual captions: A cleaned, hypernymed, image alt-text dataset for automatic image captioning. In: Proceedings of the 56th Annual Meeting of the Association for Computational Linguistics (Volume 1: Long Papers). pp. 2556–2565 (2018)
8. Sidorov, O., Hu, R., Rohrbach, M., Singh, A.: Textcaps: a dataset for image captioning with reading comprehension. In: Computer Vision—ECCV 2020: 16th European Conference, Glasgow, UK, August 23–28, 2020, Proceedings, Part II 16. pp. 742–758. Springer (2020)
9. Zhang, P., Wang, X.D.B., Cao, Y., Xu, C., Ouyang, L., Zhao, Z., Ding, S., Zhang, S., Duan, H., Yan, H., et al.: Internlm-xcomposer: A vision-language large model for advanced text-image comprehension and composition. arXiv preprint arXiv:2309.15112 (2023)
